# Supplementary material for: Spectroscopic and Kinetic Characterization of Peroxidase-Like π-Cation Radical Pinch-Porphyrin-Iron(III) Reaction Intermediate Models of Peroxidase Enzymes
Source: MDPI journal article supplement (doi:10.3390/molecules21070804), 2016-06-27
Supplement: s1 [file s1]

# Supplementary Materials: Spectroscopic and Kinetic Characterization of Peroxidase-Like $\pi$ -Cation Radical Pinch-Porphyrin-Iron(III) Reaction Intermediates, Models of Peroxidases Enzymes

Samuel Hernández Anzaldo, Uriel Arroyo Abad, Armando León García, Daniel Ramírez Rosales, Rafael Zamorano Ulloa and Yasmi Reyes Ortega

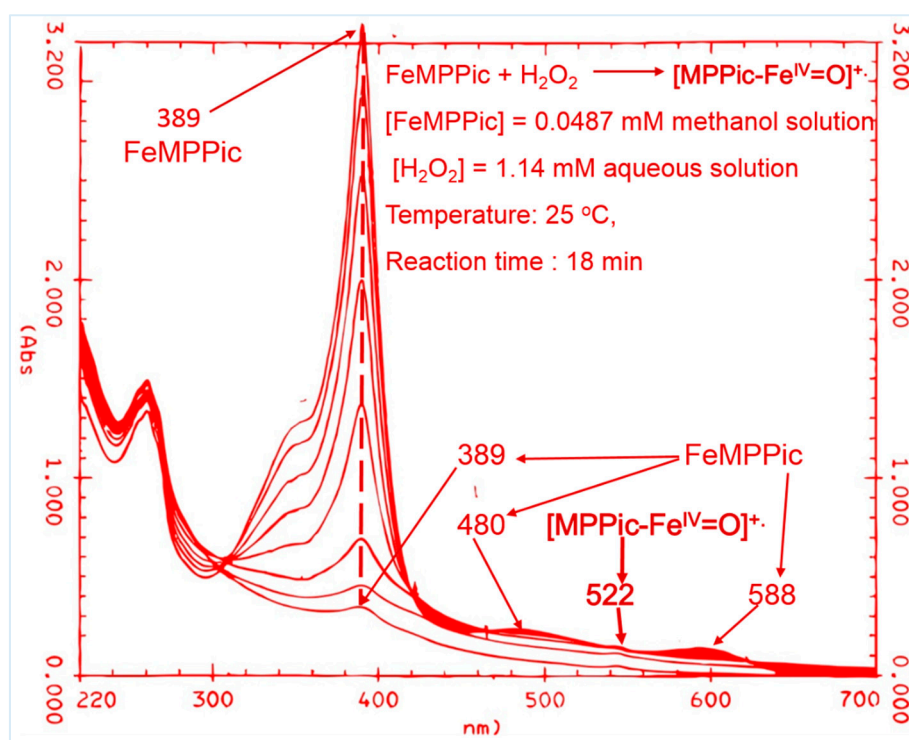

**Figure S1.** Snapshots of [FeMPPic]<sup>+</sup> formation observed 18 min. Soret band decreases indicating that the FeMPPic is autooxidizing because there is not guaiacol in reaction mixture, similar to HRP-I (compound I of Horseradish peroxidase) behavior in an excess of hydrogen peroxide, which reduce compound I. Two *d-d* transitions of the parent compound change and only is possible to observe the transition at 522 nm, corresponding to FeMPPic-I.

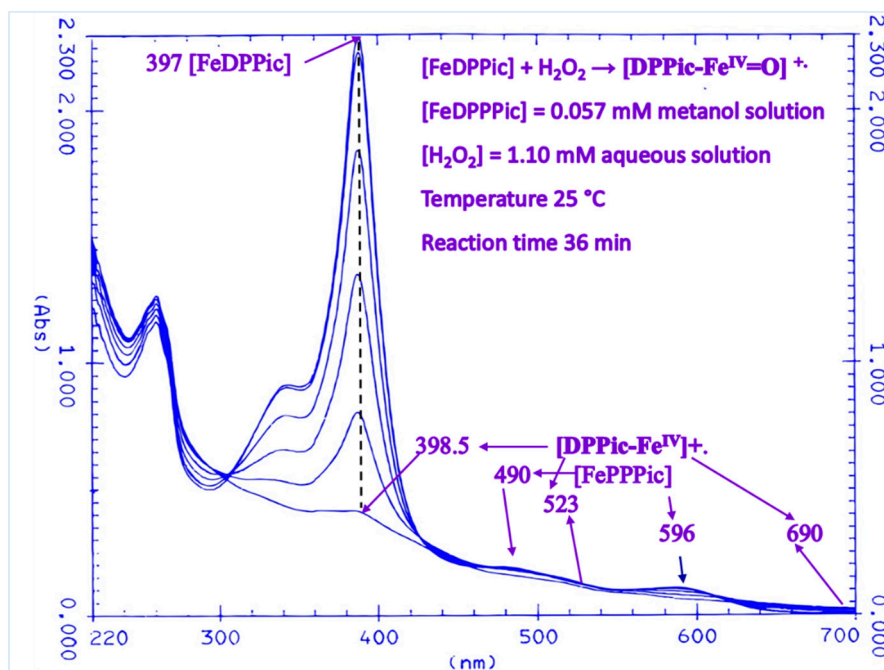

**Figure S2.** Snapshots of  $[\text{FeDPPic}]^+$  formation observed 13 min. Soret band decreases indicating that the  $\text{FeMPPic}$  is autooxidizing because there is not guaiacol in reaction mixture, similar to HRP-I (compound I of Horseradish peroxidase) behavior in an excess of hydrogen peroxide, which reduce compound I. Only one  $d-d$  transitions at  $\lambda_{\text{max}} = 522 \text{ nm}$  is observed, which corresponds to  $\text{FeDPPic-I}$ .

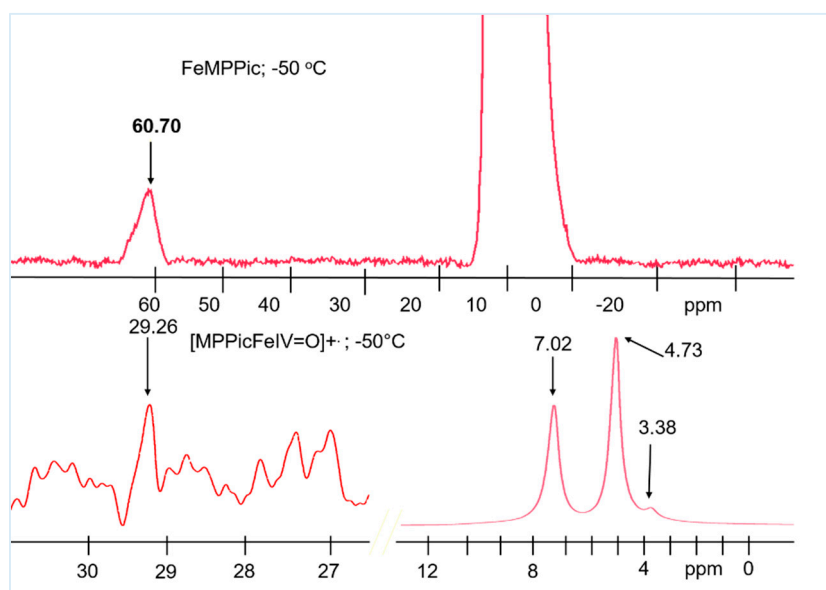

**Figure S3.**  $^1\text{H-NMR}$  spectrum for (top)  $\text{FeMPPic}$  with chemical shifts at  $60.70 \text{ ppm}$ ; (bottom)  $[\text{MPPicFe}^{\text{IV}}=\text{O}]^+$  with signals shifted at  $29.26 \text{ ppm}$ .

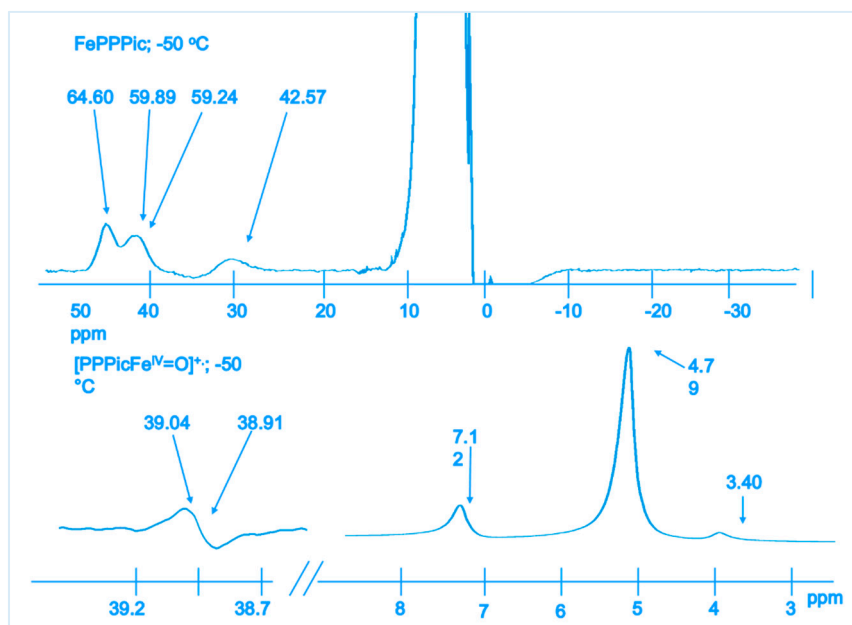

**Figure S4.**  $^1\text{H-NMR}$  spectrum for (top) FePPPic with chemical shifts at 64.60 ppm; (bottom)  $[\text{PPPicFe}^{\text{IV}}=\text{O}]^+$  with signals shifted at 39.04 ppm.

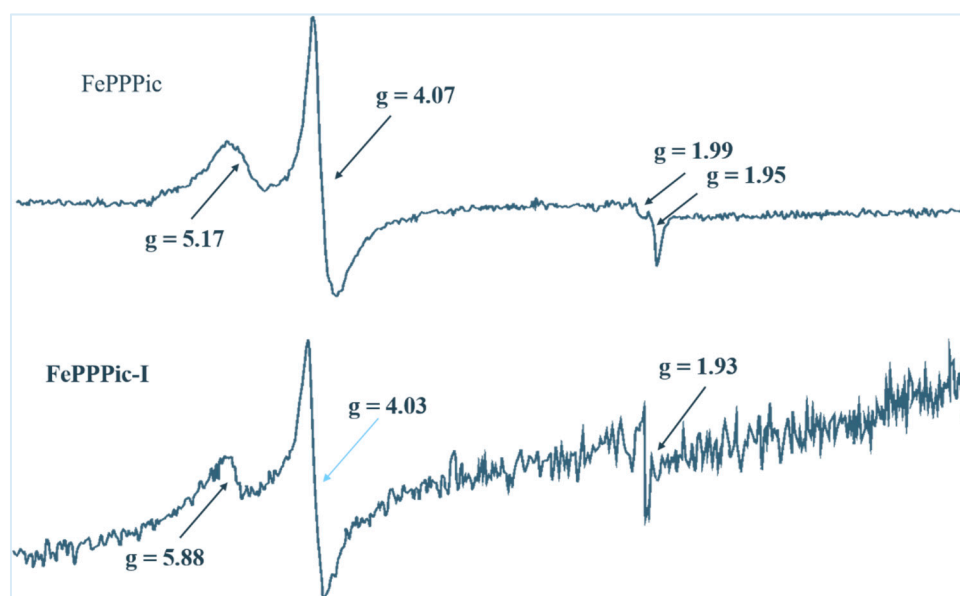

**Figure S5.** ESR spectrum for (top) FePPPic with signals of two qms species of Fe(III); (bottom)  $[\text{PPPicFe}^{\text{IV}}=\text{O}]^+$  with signals of one species of Fe(III) with qms, other species of Fe(IV) with  $g$  value of 4.3 and a signal characteristic of radical at  $g = 1.93$ .

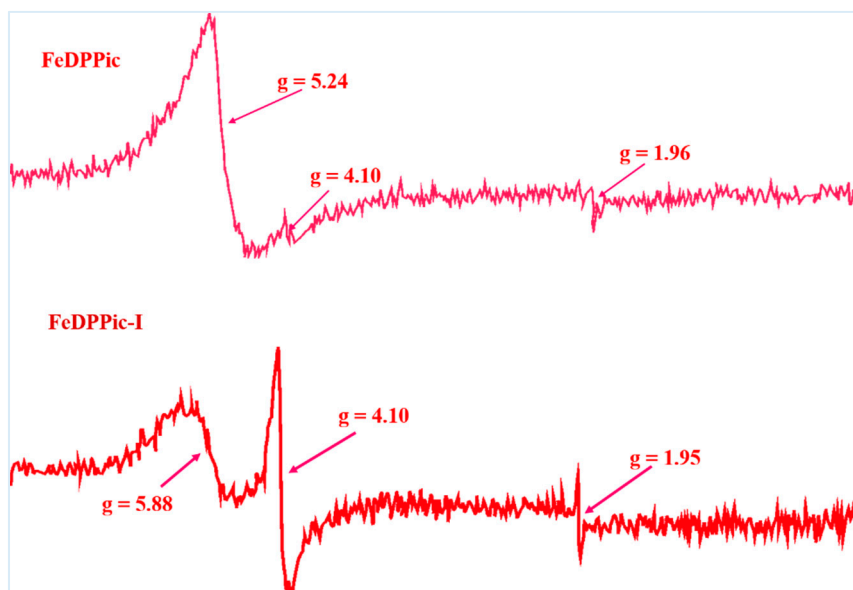

**Figure S6.** ESR spectrum for (top) FeDPPic with signals of two qms species of Fe(III); (bottom) [PPPicFe<sup>IV</sup>=O]<sup>+</sup> with signals of one species with Fe(IV) and g value of 4.3, and other signal of radical with g value of 1.95.
